# Supplementary material for: The Impact of Mineral and Energy Supplementation and Phytogenic Compounds on Rumen Microbial Diversity and Nitrogen Utilization in Grazing Beef Cattle
Source: MDPI journal article supplement (doi:10.3390/microorganisms11030810), 2023-03-22
Supplement: s1 [file s1]

**Table S1.** Median  $\pm$  interquartile range of alpha diversity as richness index (ACE and Chao 1) and diversity estimators (Fisher, Simpson, and Shannon) of ruminal microbial population in Nellore cattle grazing *Urochloa brizantha* cv. Marandu and supplemented or not with phytogetic compounds during the rainy season.

|         | Supplements <sup>1</sup> |                    |                   |                   | P-value <sup>2</sup> |       |                 |
|---------|--------------------------|--------------------|-------------------|-------------------|----------------------|-------|-----------------|
|         | EW                       | EPHA               | MW                | MPHA              | ST                   | PHA   | ST $\times$ PHA |
| ACE     | 103.78 $\pm$ 45.96       | 120.11 $\pm$ 38.86 | 89.32 $\pm$ 67.53 | 98.35 $\pm$ 39.41 | 0.363                | 0.813 | 0.729           |
| Chao1   | 100.50 $\pm$ 45.75       | 116.50 $\pm$ 39.50 | 86.50 $\pm$ 66.50 | 95.00 $\pm$ 38.00 | 0.363                | 0.782 | 0.723           |
| Fisher  | 13.35 $\pm$ 4.13         | 15.27 $\pm$ 2.92   | 11.61 $\pm$ 6.38  | 13.27 $\pm$ 4.98  | 0.236                | 0.937 | 0.639           |
| Shannon | 3.61 $\pm$ 0.27          | 3.59 $\pm$ 0.25    | 3.52 $\pm$ 0.40   | 3.46 $\pm$ 0.24   | 0.144                | 0.693 | 0.429           |
| Simpson | 0.95 $\pm$ 0.012         | 0.95 $\pm$ 0.012   | 0.95 $\pm$ 0.016  | 0.94 $\pm$ 0.011  | 0.198                | 0.621 | 0.498           |

<sup>1</sup>EW= energy supplement without phytogetic compounds addition. EPHA= energy supplement with phytogetic compounds addition. MW= mineral supplement without phytogetic compounds addition. MPHA = mineral supplement with phytogetic compounds addition. <sup>2</sup>ST = effect of the type of supplement as mineral or energy supplement by a Friedman test. PHA = effect of the addition of phytogetic compounds blend containing 10% of carvacrol and cinnamaldehyde oil and 90% hydrolyzable tannins extracted from berries and grapes at a dose of 1.5 g/kg of ingested dry matter by a Friedman test.
